# Supplementary material for: Comparative DNA methylome analysis of endometrial carcinoma reveals complex and distinct deregulation of cancer promoters and enhancers
Source: PubMed Central journal article supplement (PMC4198682; doi:10.1186/1471-2164-15-868), 2014-10-06

Supplementary Fig.S1

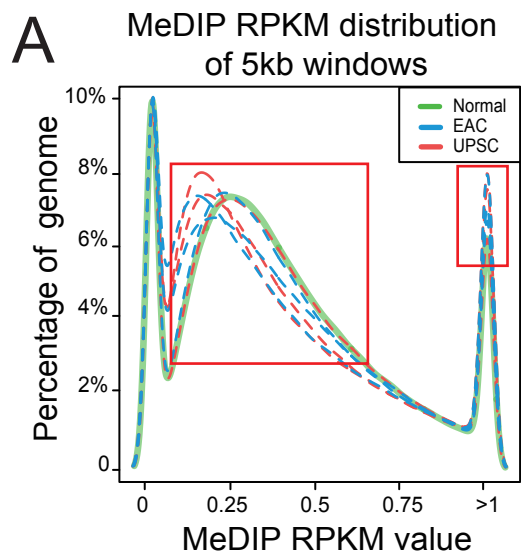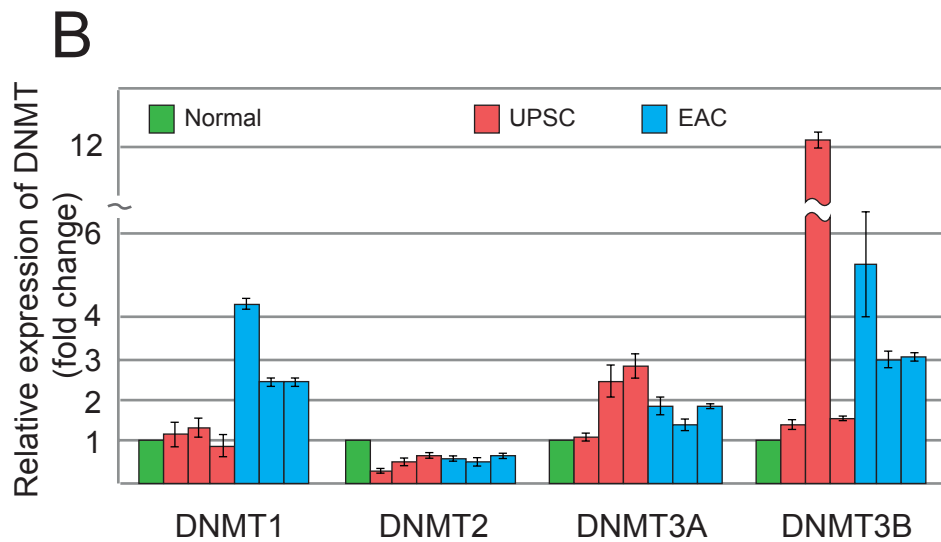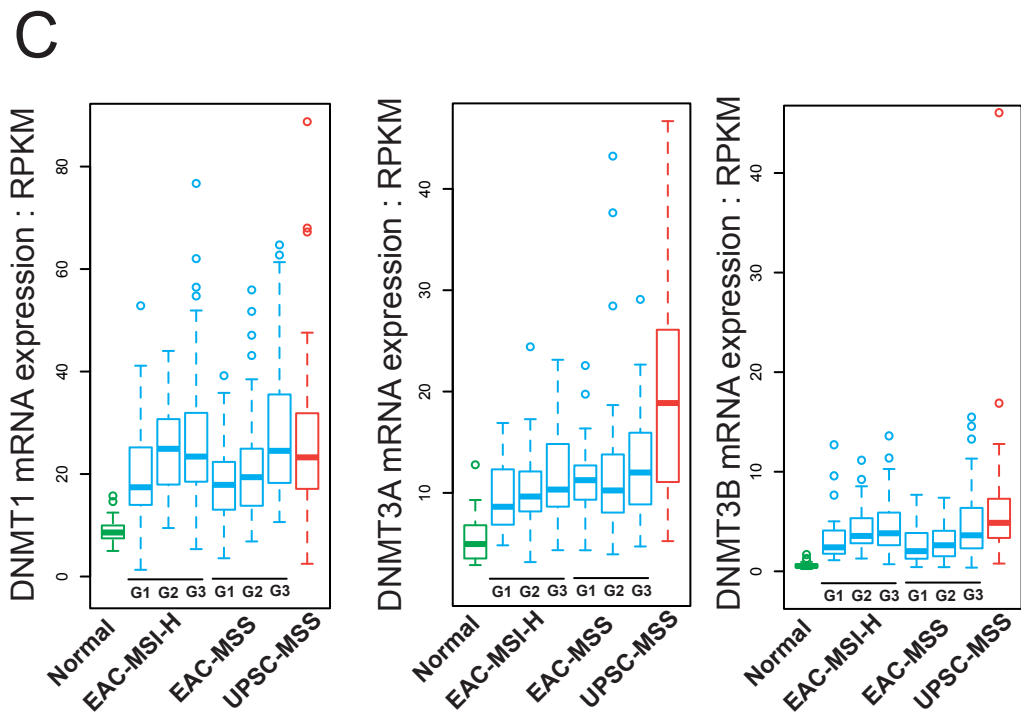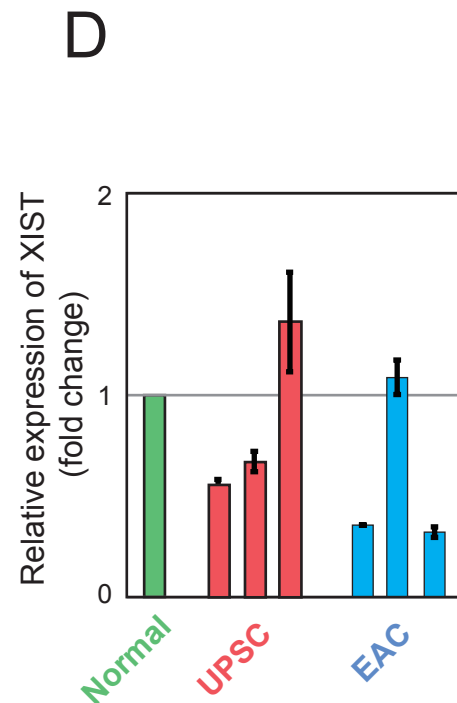

A

## DMRs overlap ENCODE open chromatin features

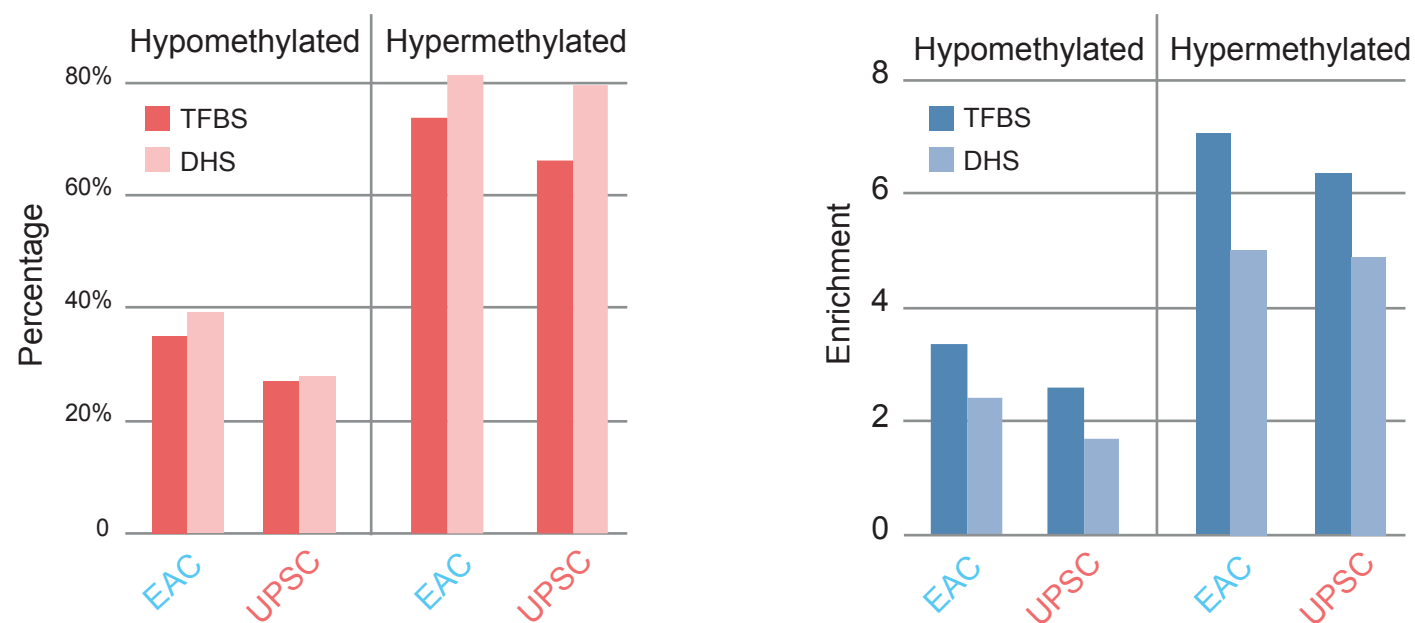

B

## Genomic distribution of DMRs

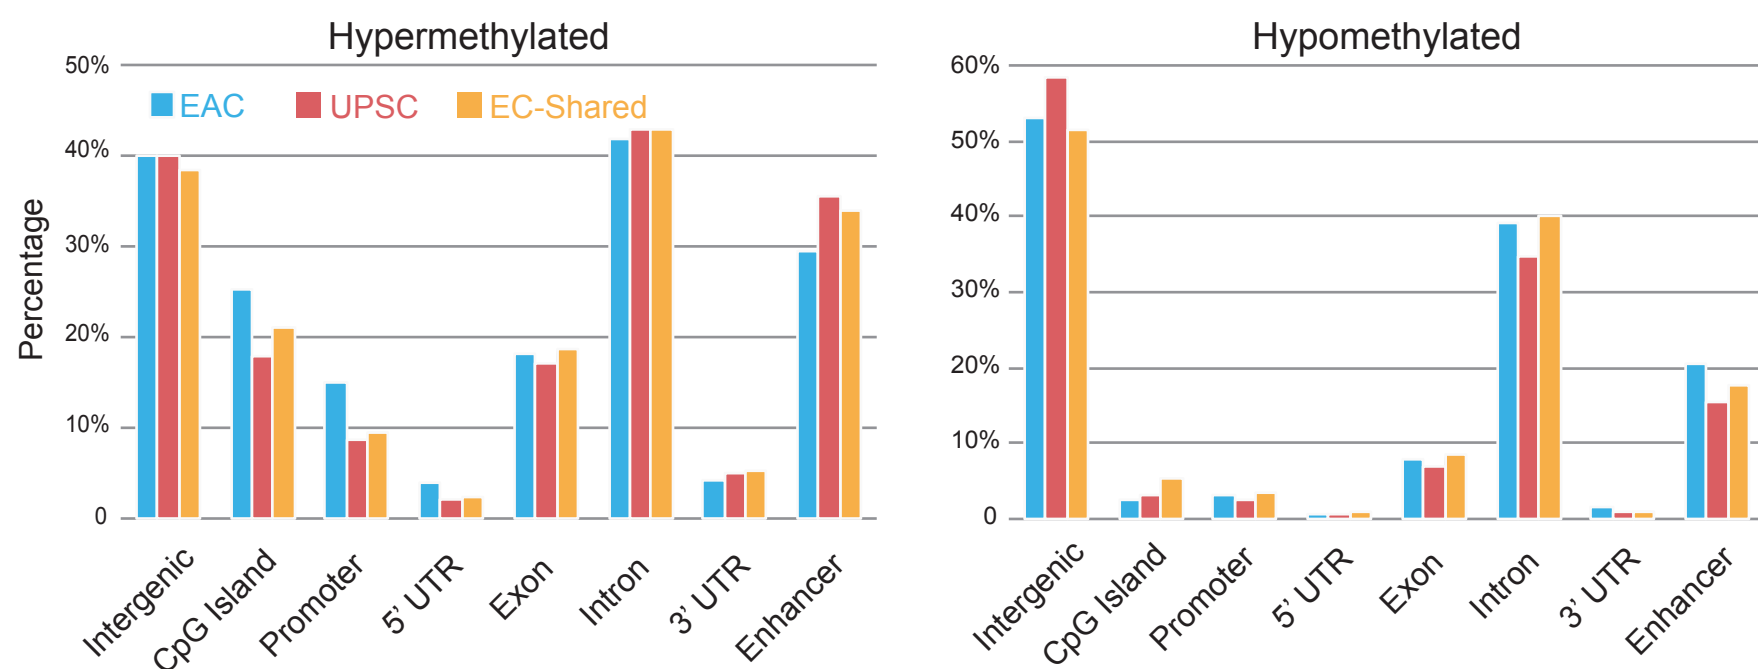

C

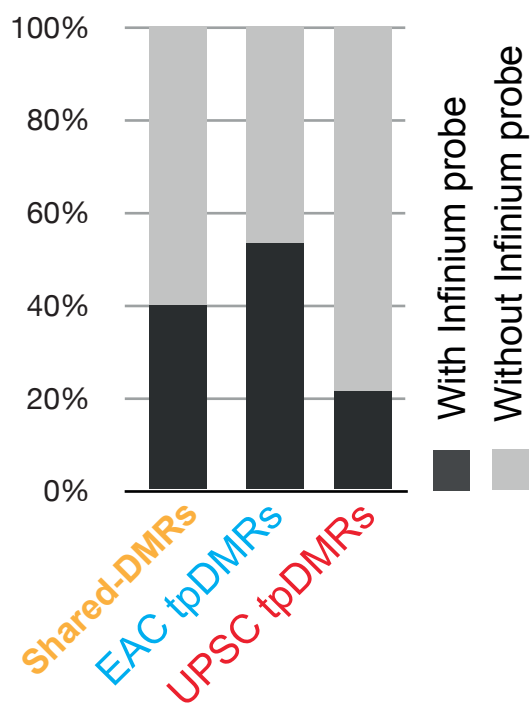

D

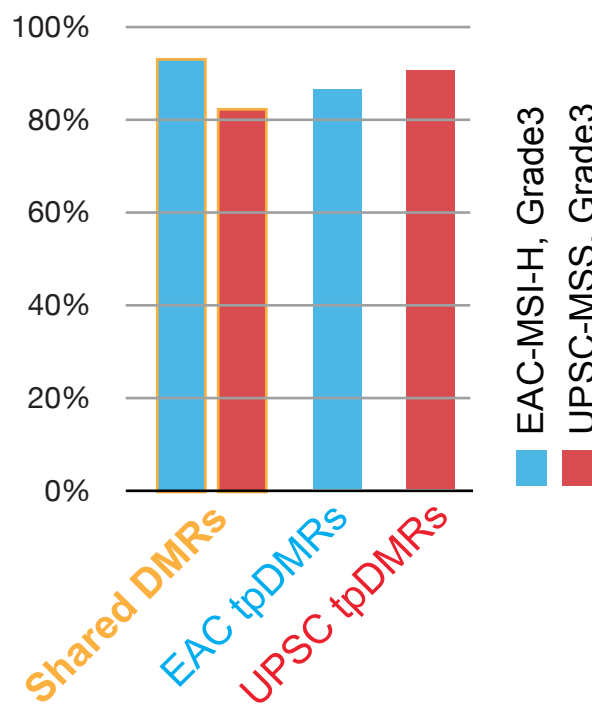

E

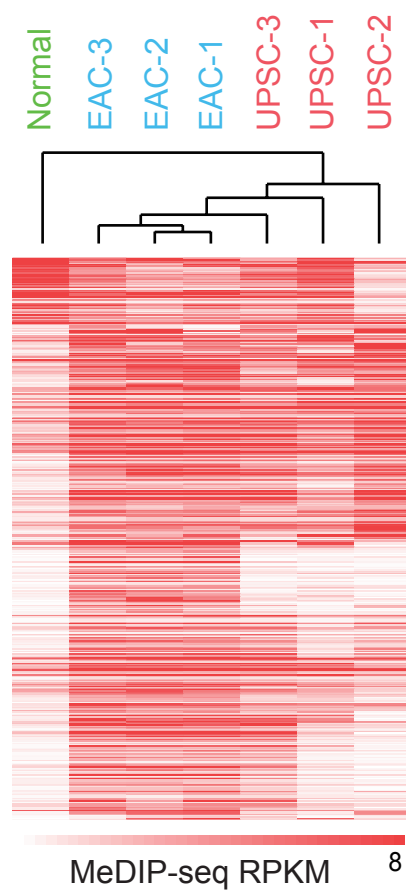

# Supplementary Fig.S3

## A

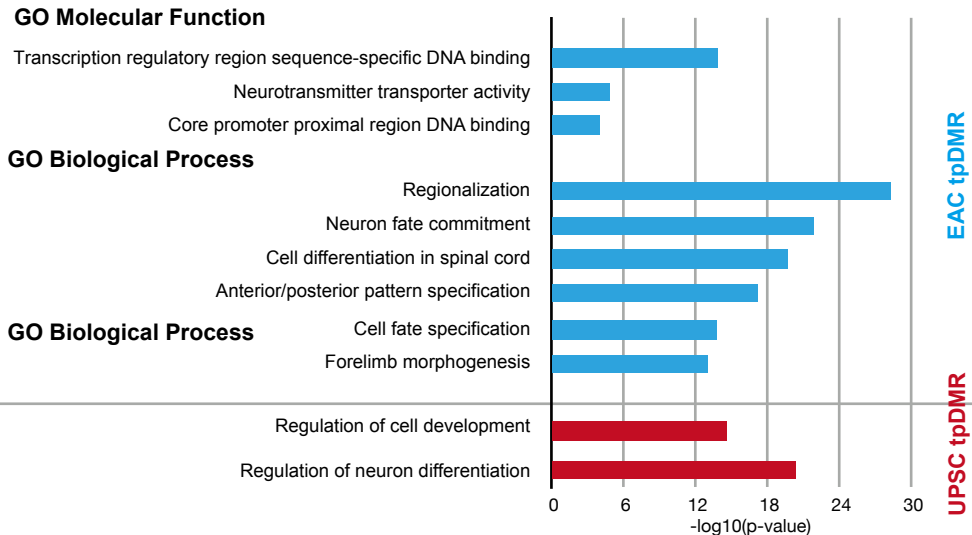

## B

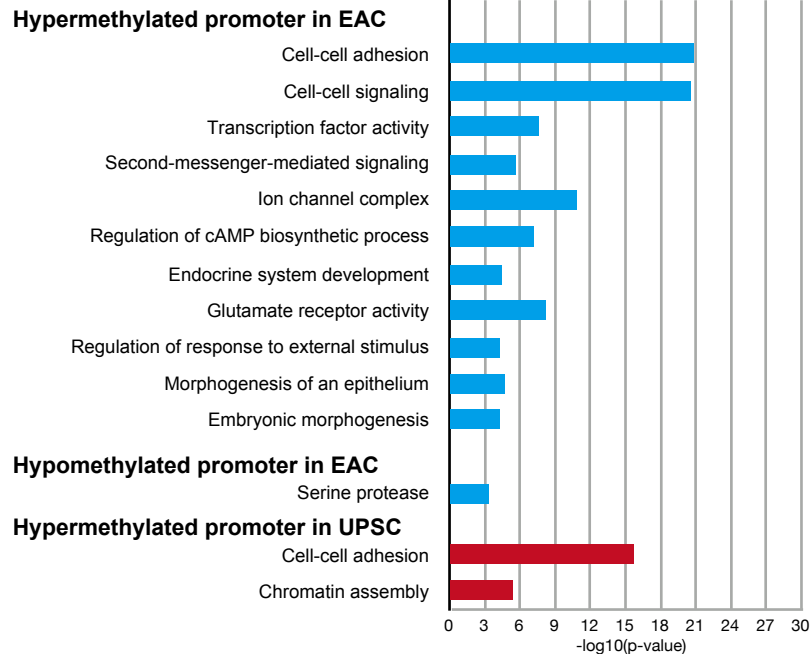

# Supplementary Fig.S4

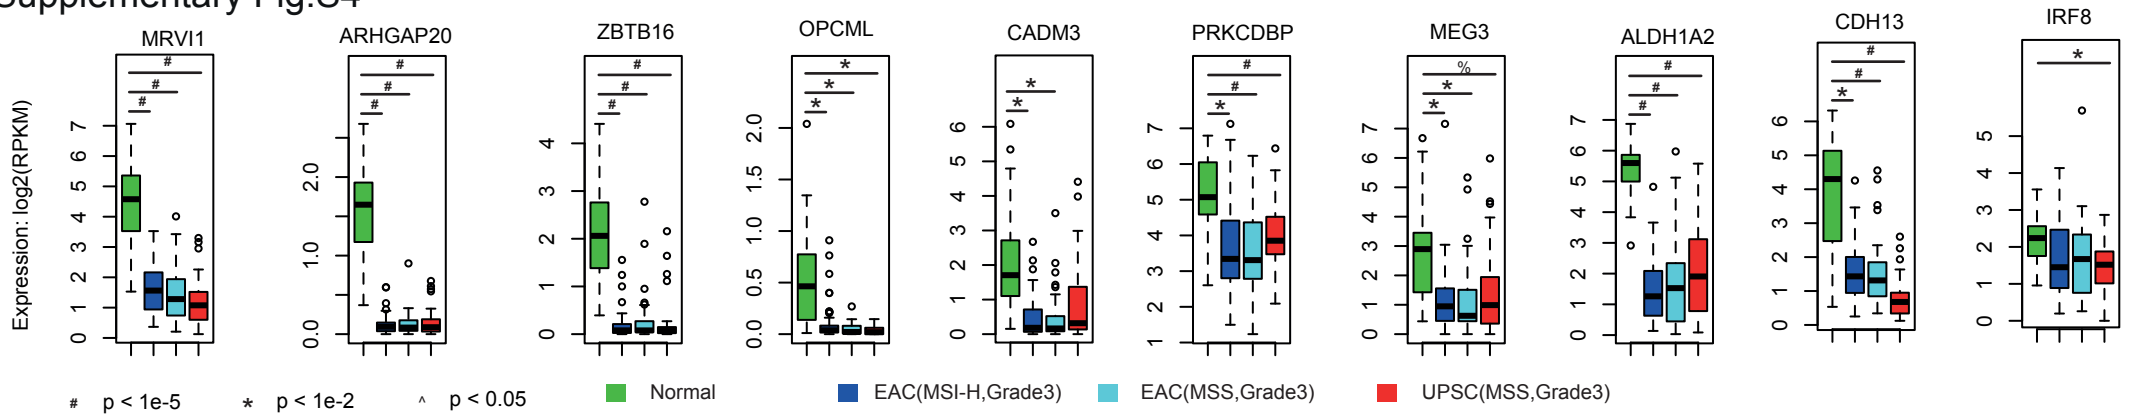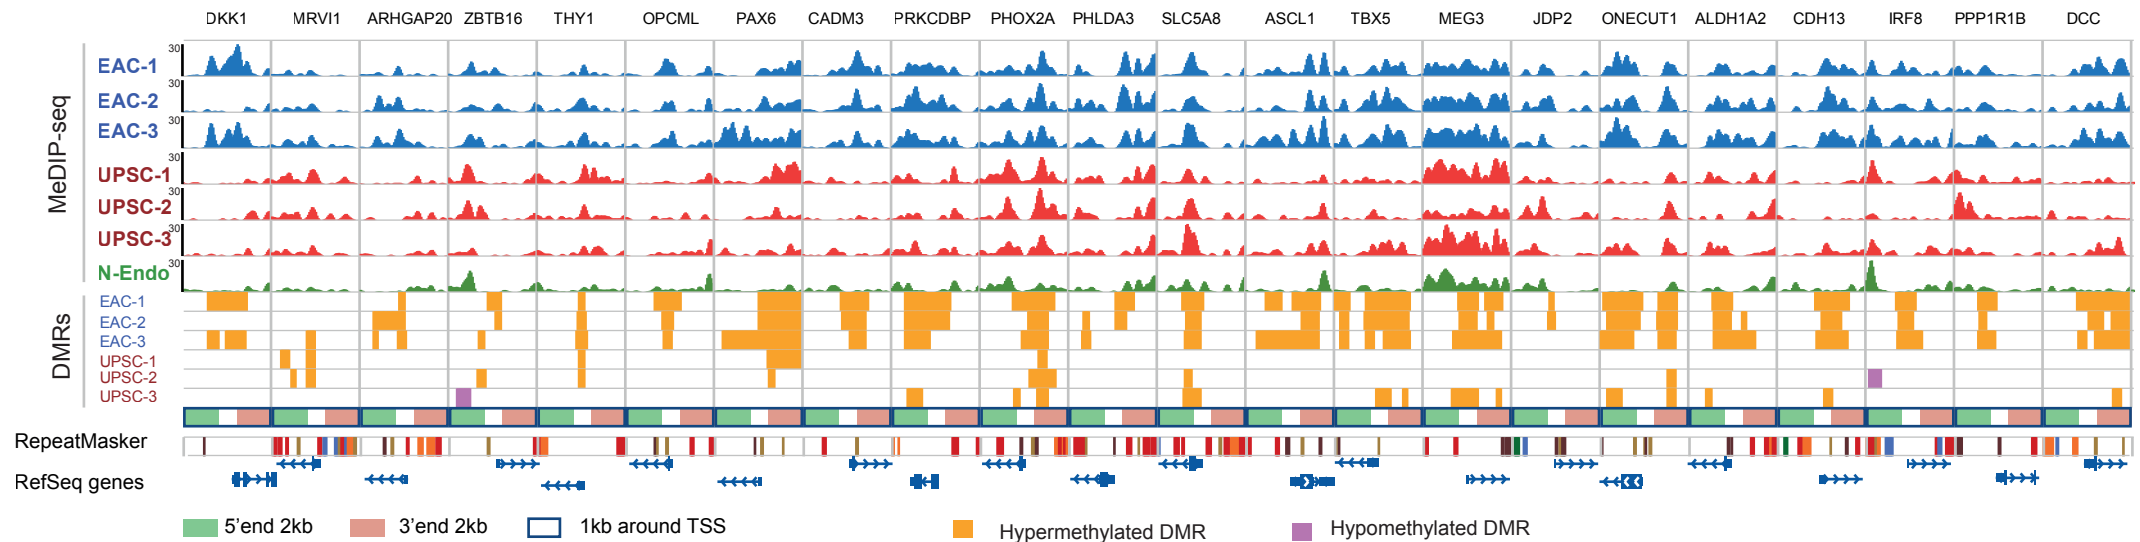

# Supplementary Fig.S5

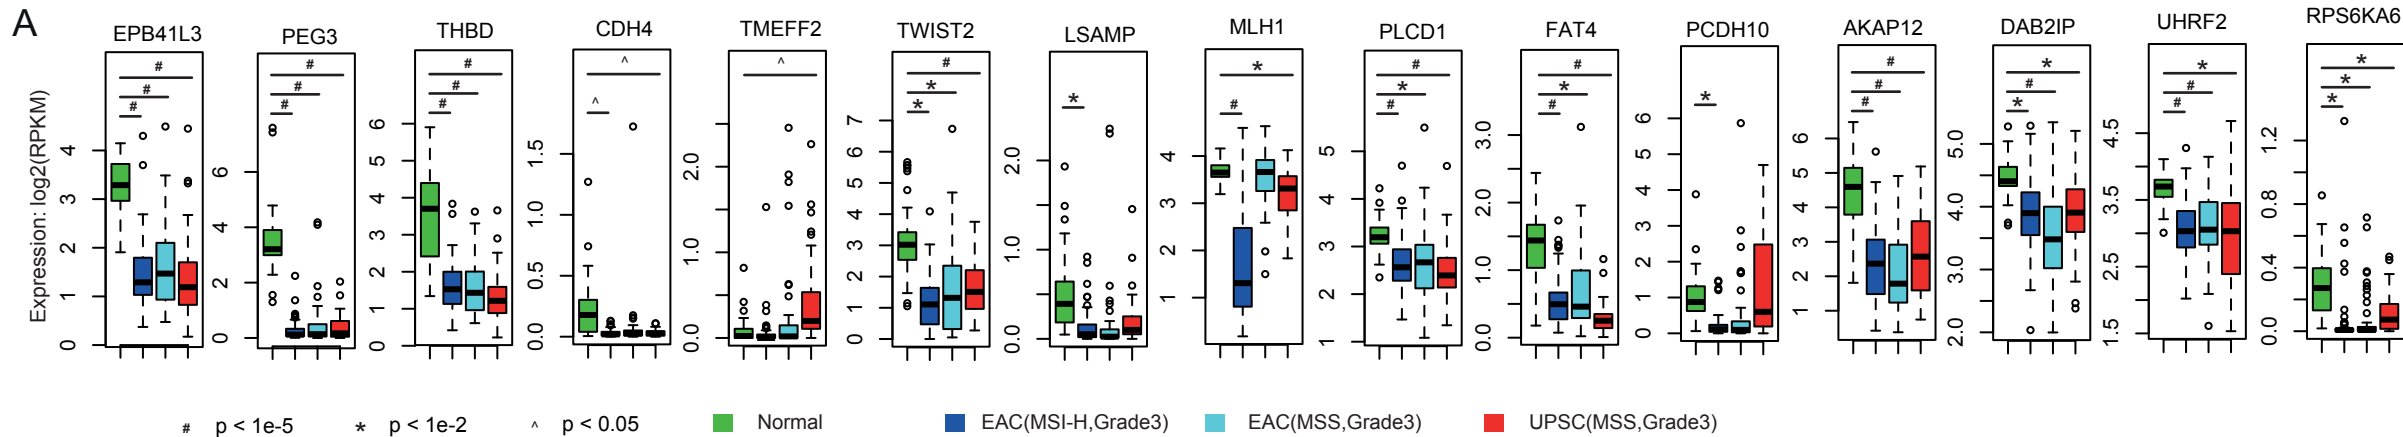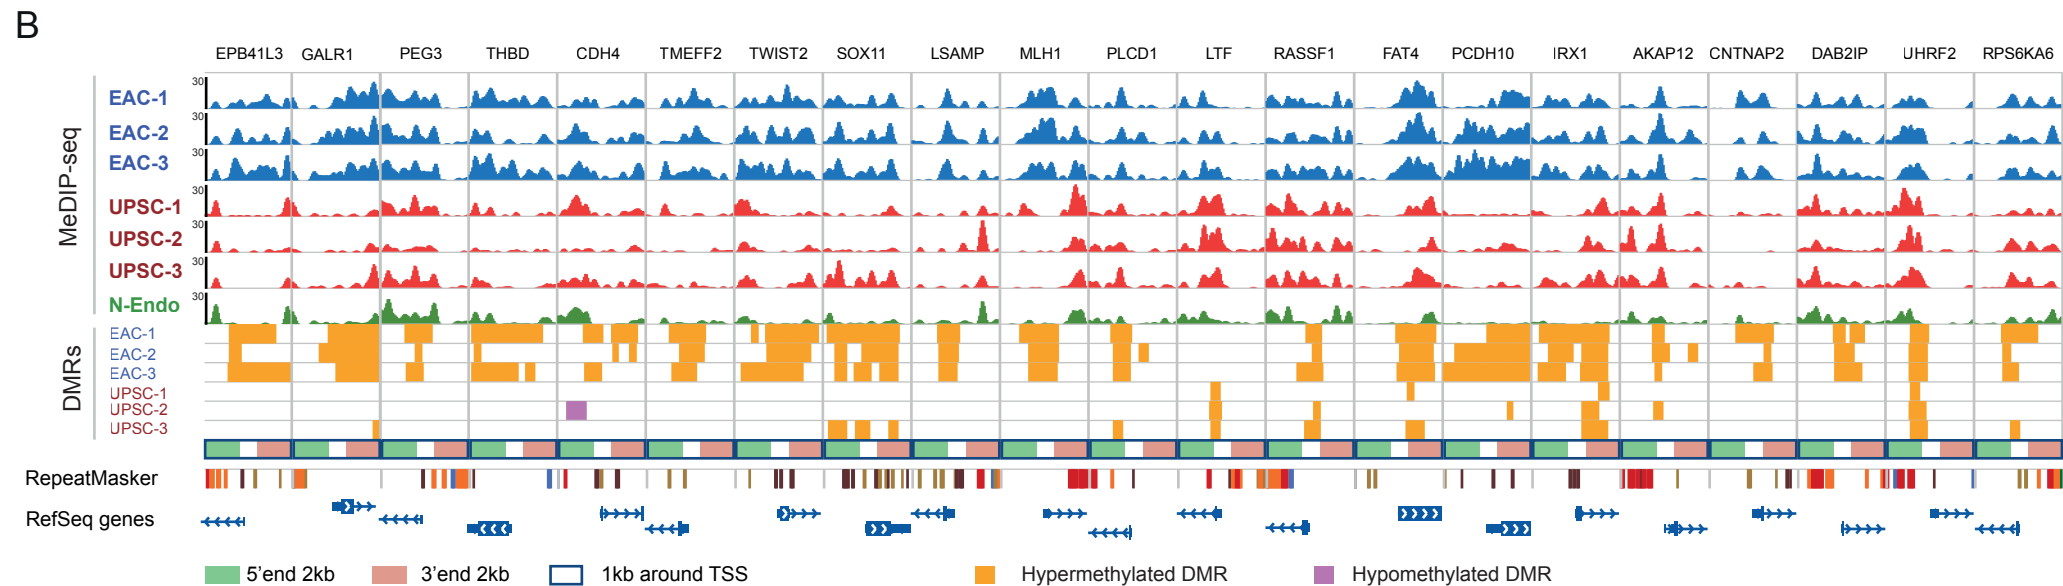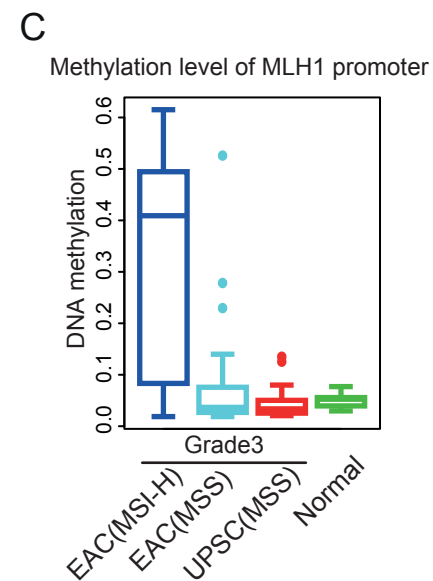

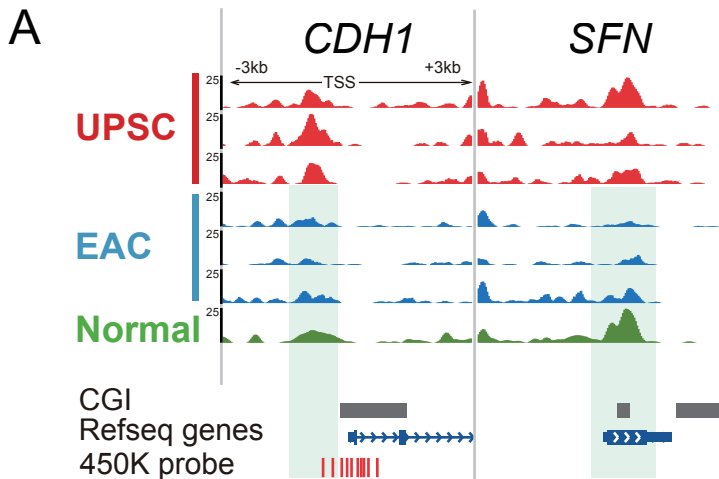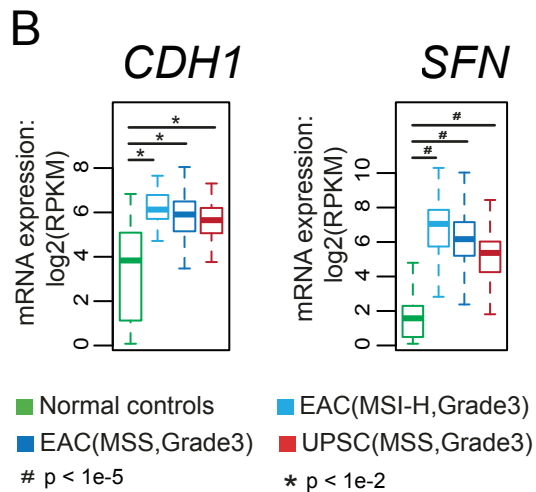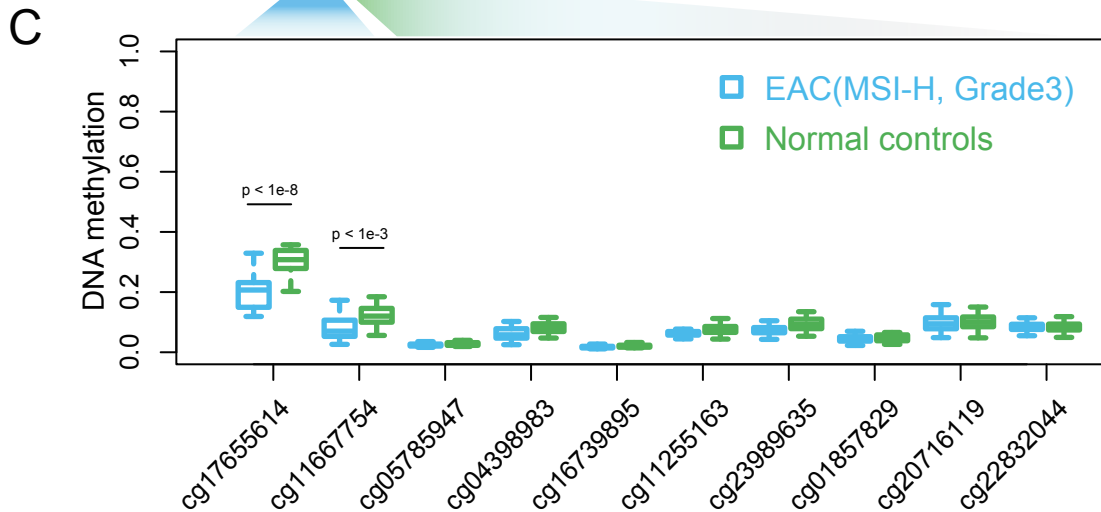

## MeDIP and MRE RPKM fold change on chromosome 10 at 500kb resolution

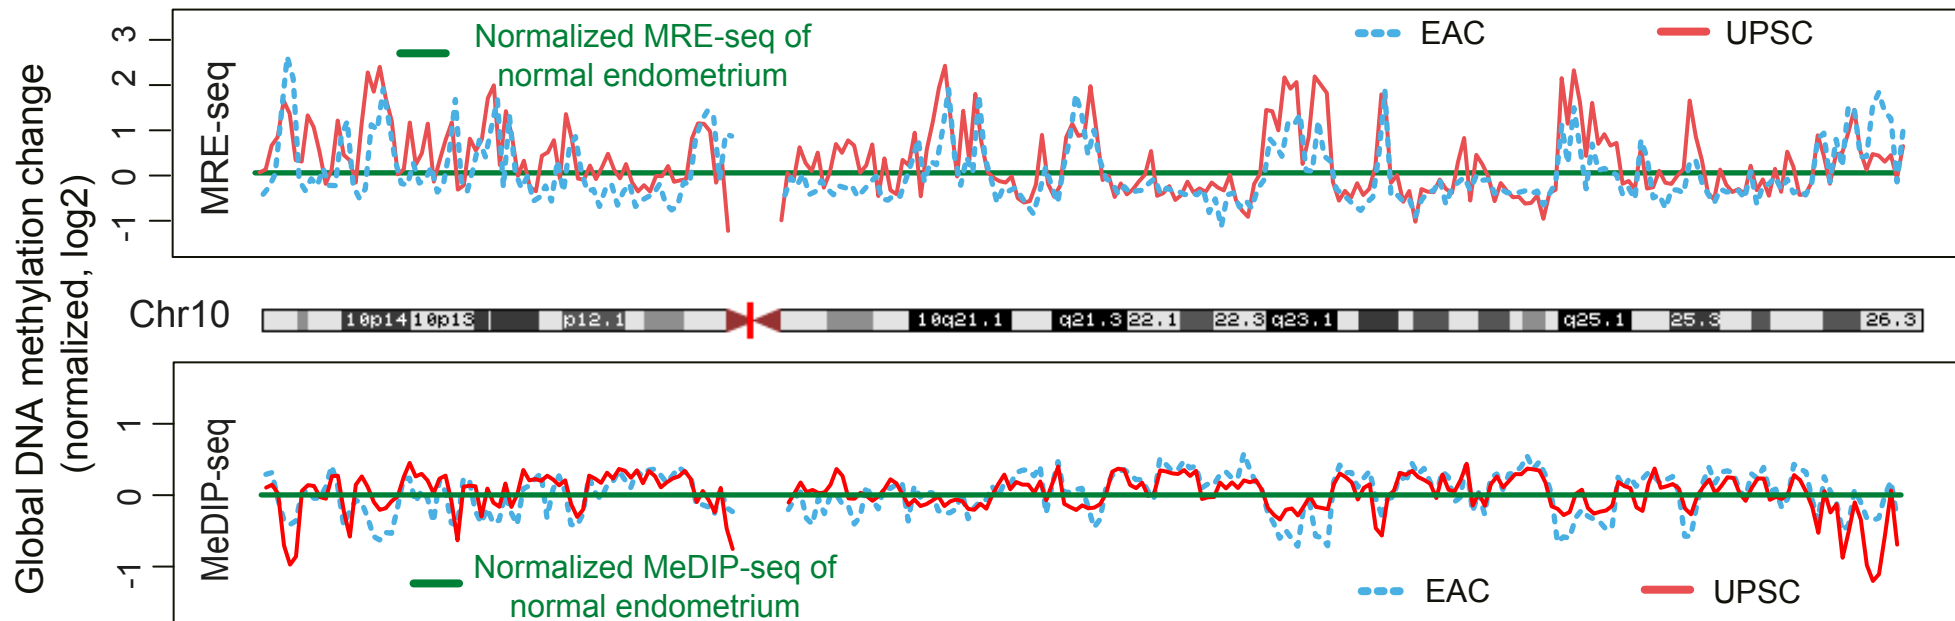

A

|                      |                 | EAC | UPSC |
|----------------------|-----------------|-----|------|
| <b>MiRNA-cluster</b> | Hypermethylated | 24  | 9    |
|                      | Hypomethylated  | 6   | 2    |
| <b>lncRNA</b>        | Hypermethylated | 621 | 168  |
|                      | Hypomethylated  | 207 | 245  |

B

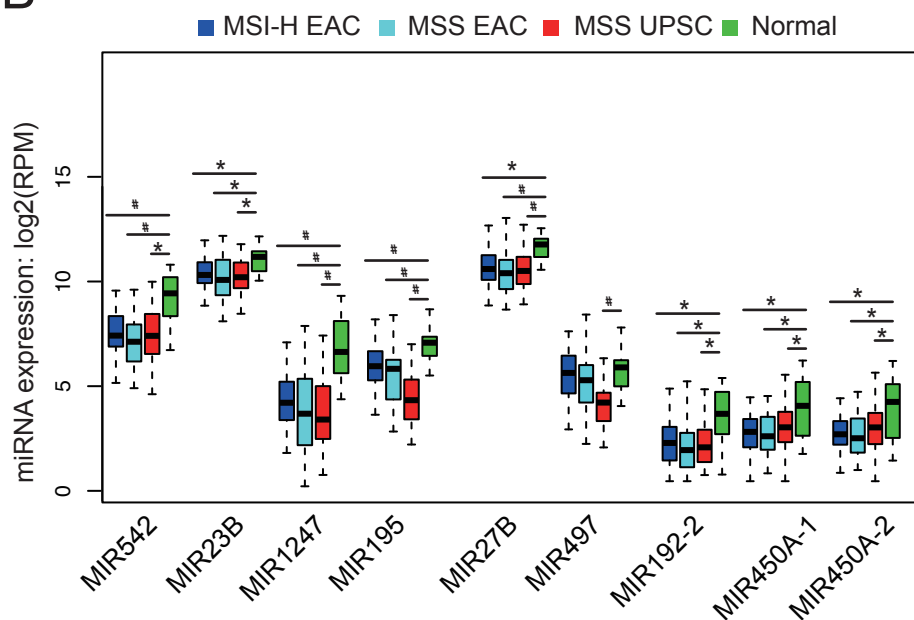

C

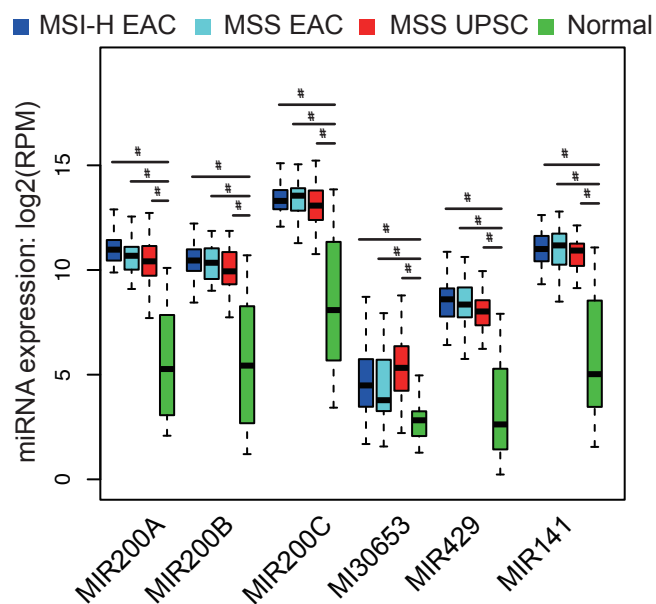

E

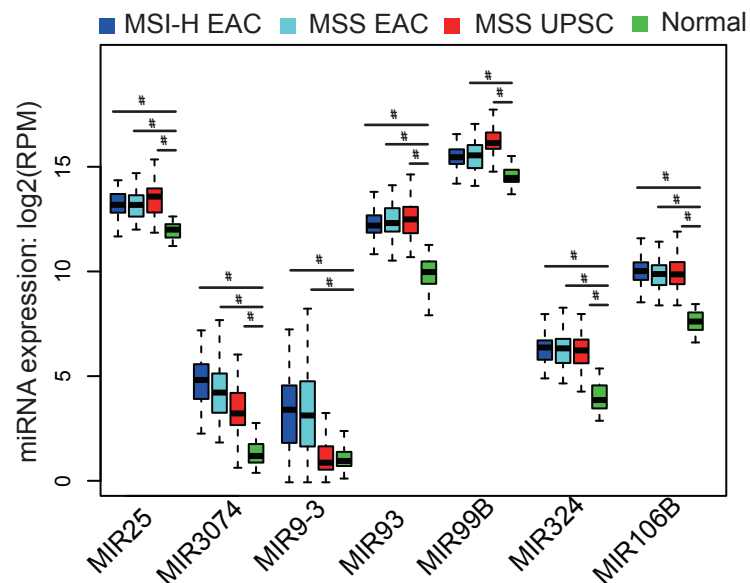

D

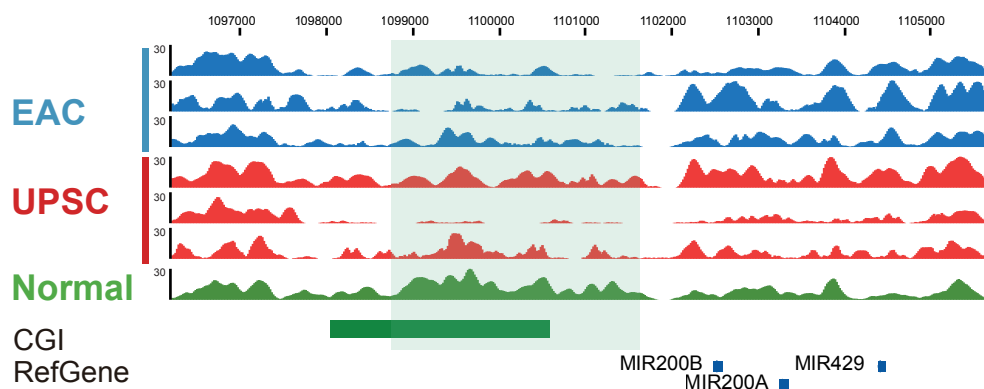



Supplementary Fig.S9

A

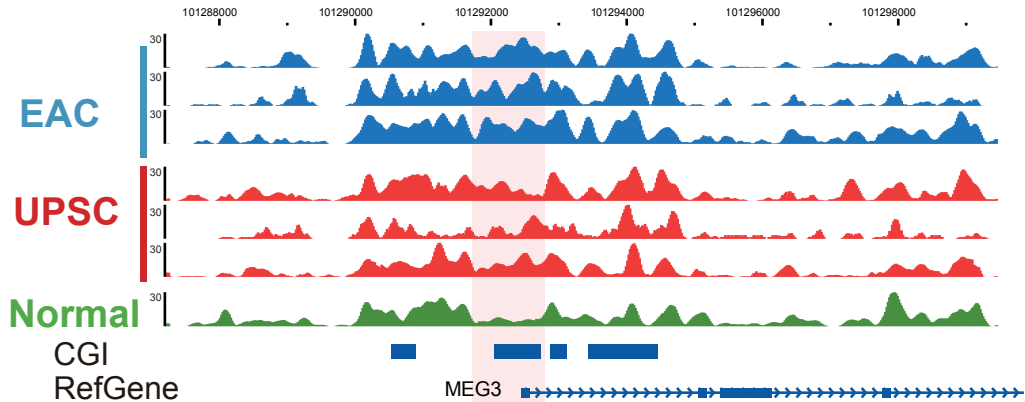

B

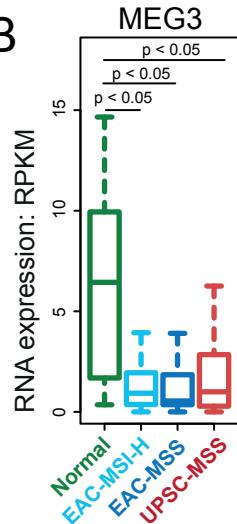

A

Methylation pattern MMU: EAC DMR with promoter state

Disease Ontology & Mouse Phenotype :  $-\log_{10}(p\text{-value})$

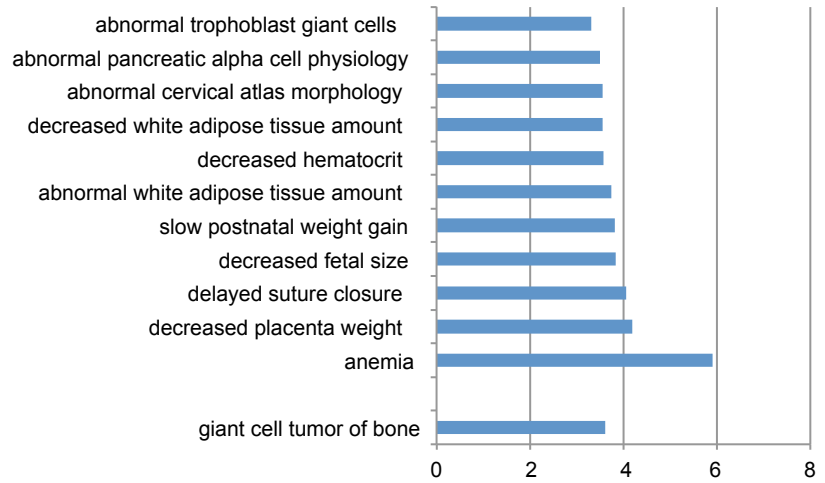

Methylation pattern UUM: EAC DMR with promoter state

GO Biological Process:  $-\log_{10}(p\text{-value})$

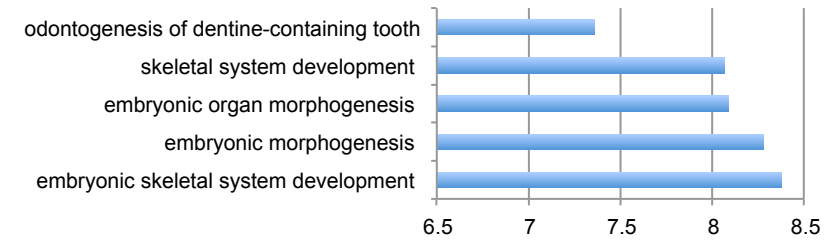

Methylation pattern UUM: UPSC DMR with promoter state

GO Molecular Function:  $-\log_{10}(p\text{-value})$

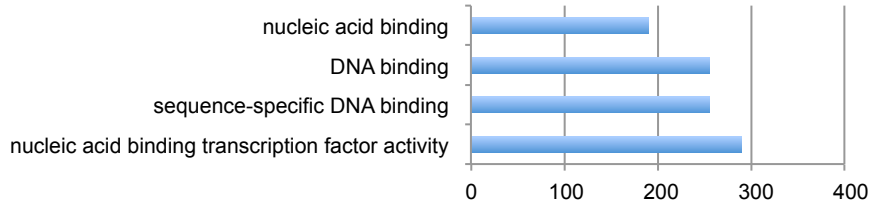

Methylation pattern UUM: EAC DMR with promoter state

GO Molecular Function:  $-\log_{10}(p\text{-value})$

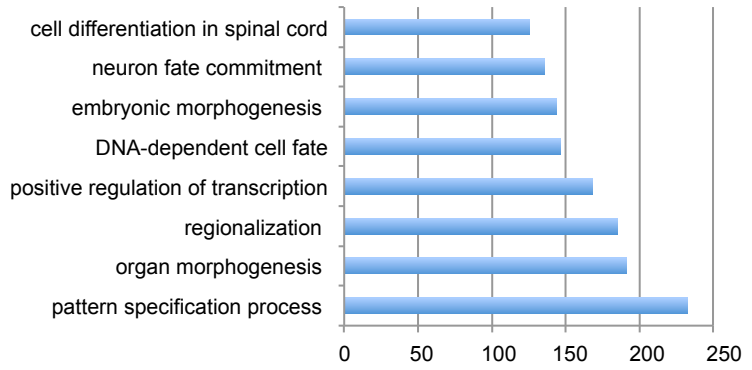

B

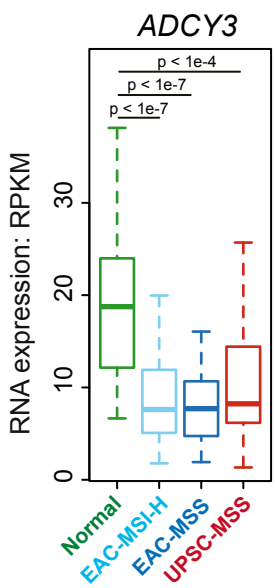

## DNA methylation change of transposable element families

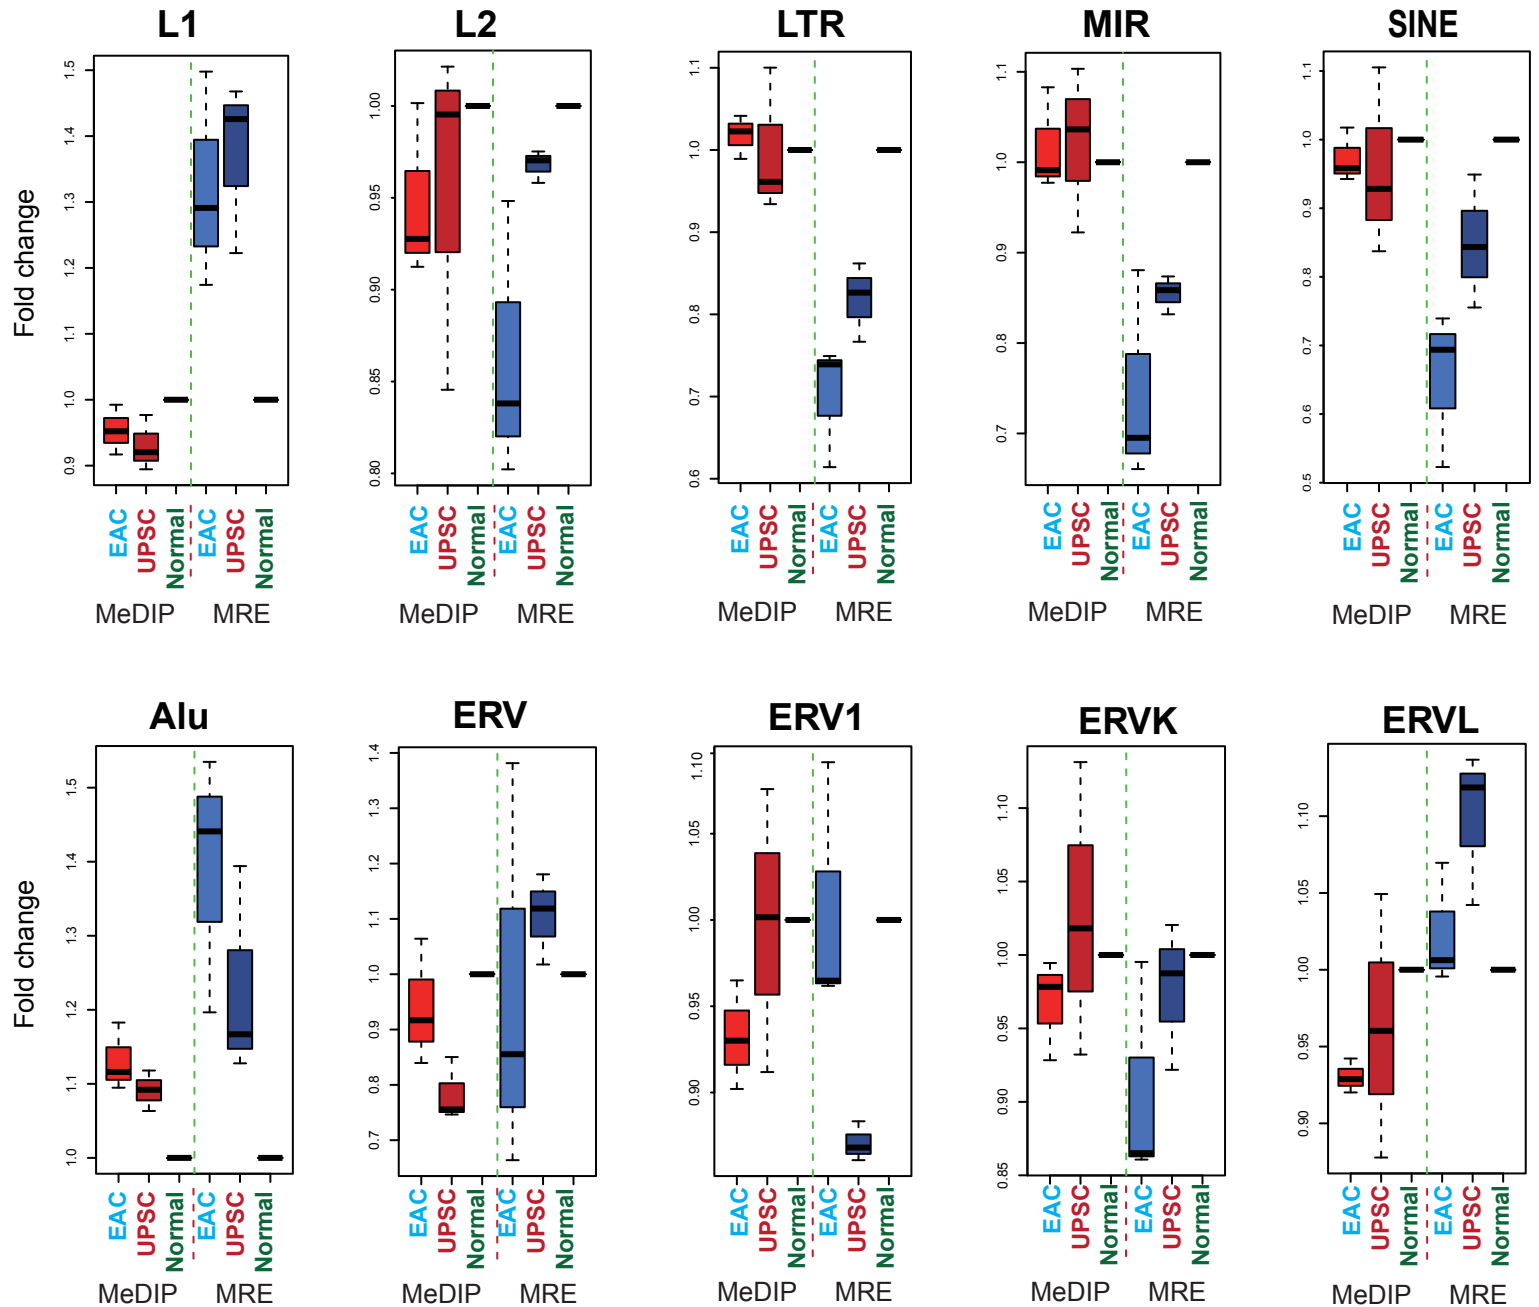

A

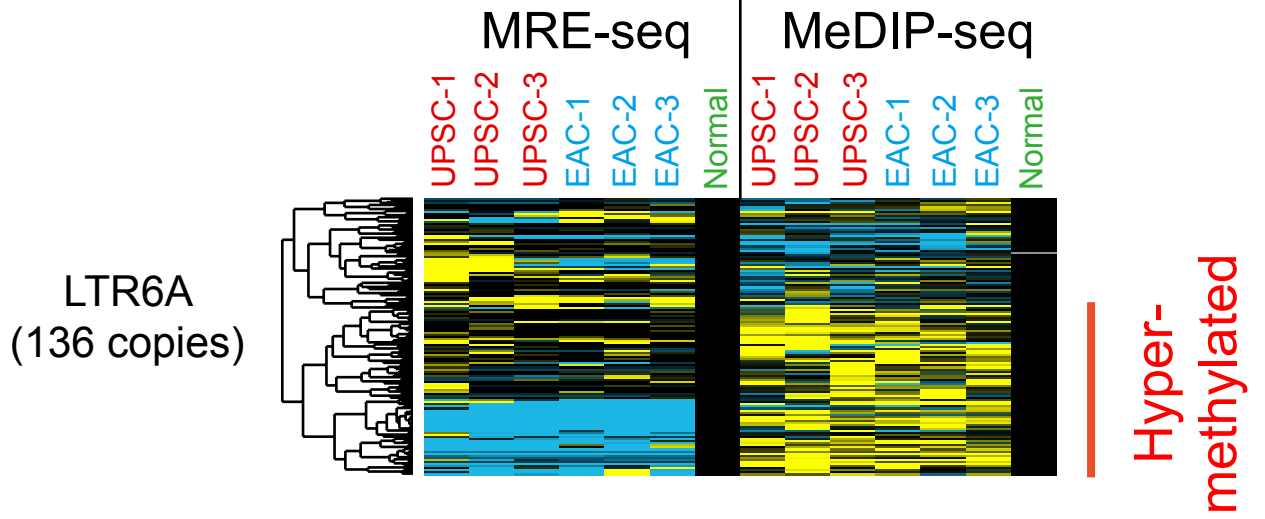

B

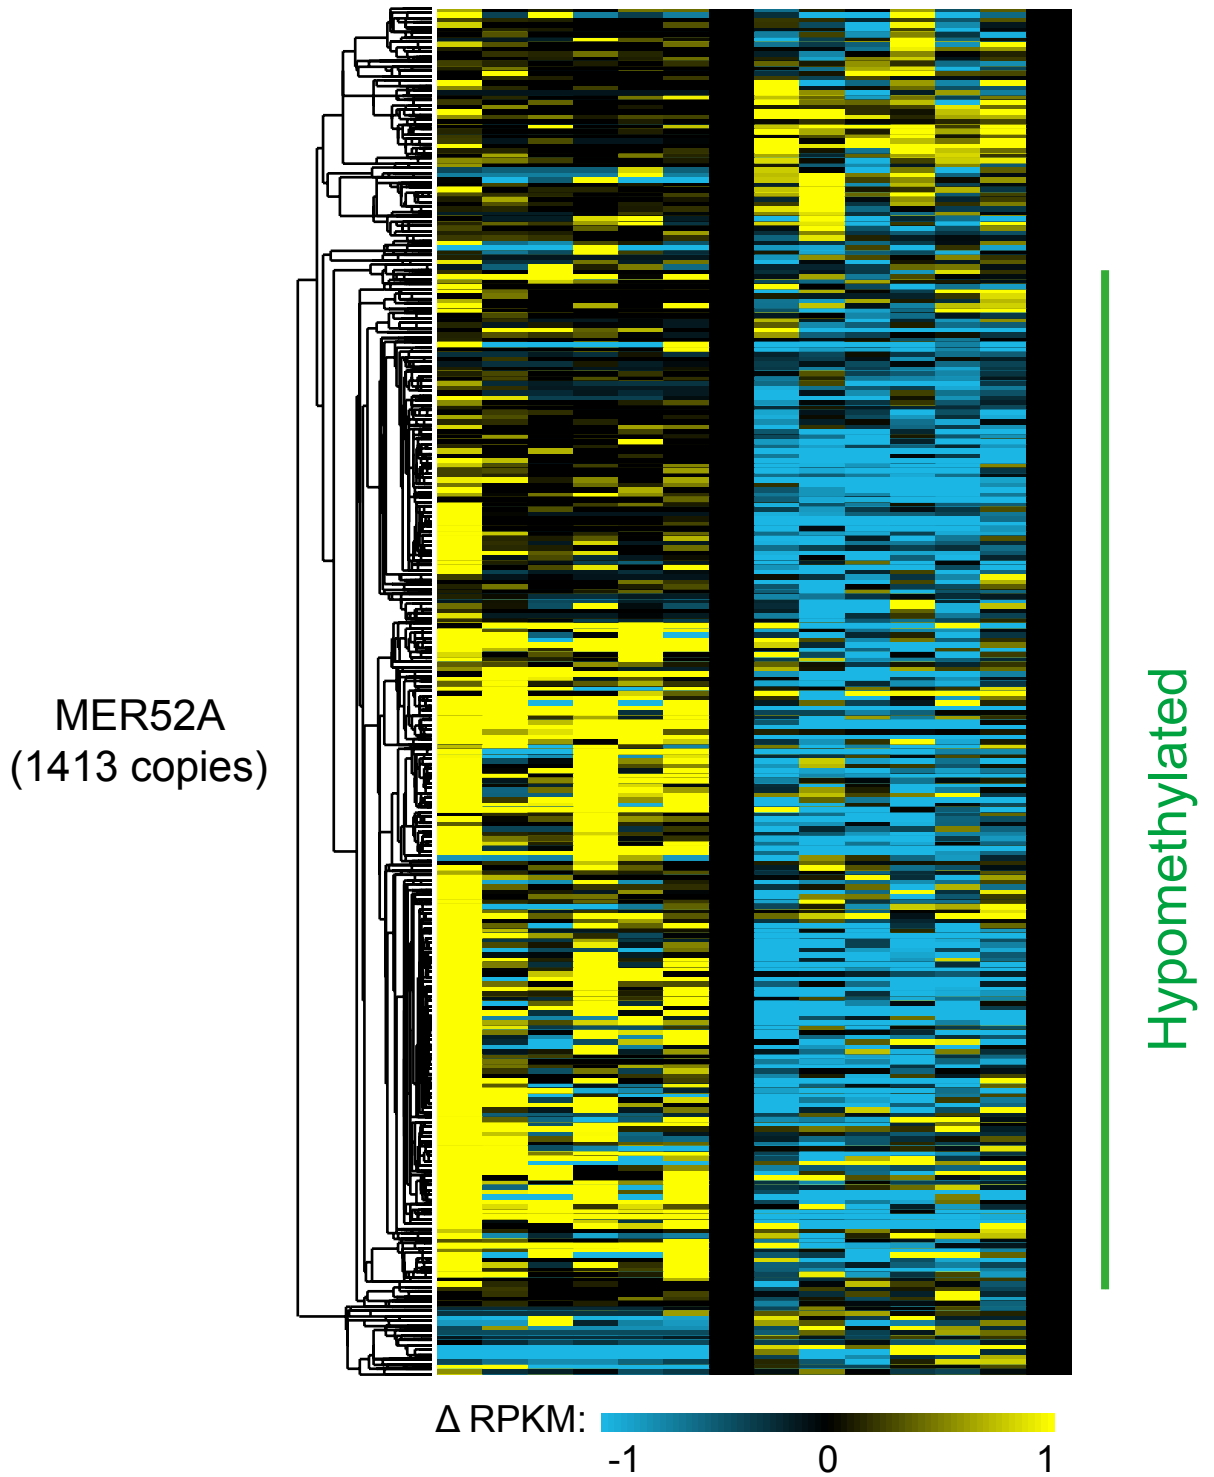

Supplement: 12864_2014_6545_MOESM2_ESM.pdf [file 12864_2014_6545_MOESM2_ESM.pdf]
